# Supplementary material
Source: publisher figshare collection journal article supplement (https://gsajournals.figshare.com/ndownloader/files/23581844)
Supplement: Supplementary file 1 [file 23581844]

## Sheet: Table S6
Source1	Source2	Target	ƒ3	Standard error	Z-score
Russia	Chinese	Denmark	0.045614	0.011723	3.891
Kazakhstan	Chinese	Denmark	0.051919	0.011784	4.406
Greece	Chinese	Denmark	0.049117	0.010211	4.81
Northern Finland	Chinese	Denmark	0.049656	0.009828	5.053
Vega, Norway	Chinese	Denmark	0.043838	0.008283	5.293
Smola, Norway	Chinese	Denmark	0.053312	0.009211	5.788
Netherlands	Chinese	Denmark	0.079185	0.013532	5.852
Gilan, Iran	Chinese	Denmark	0.057578	0.009475	6.077
Southern Finland	Chinese	Denmark	0.055697	0.009136	6.097
Fereydunkenar, Iran	Chinese	Denmark	0.062129	0.009569	6.493
Turkey2	Chinese	Denmark	0.19321	0.024266	7.962
Turkey1	Chinese	Denmark	0.730898	0.044535	16.412
Russia	Chinese	Fereydunkenar, Iran	0.040788	0.011155	3.657
Kazakhstan	Chinese	Fereydunkenar, Iran	0.039725	0.008996	4.416
Greece	Chinese	Fereydunkenar, Iran	0.054985	0.010719	5.129
Denmark	Chinese	Fereydunkenar, Iran	0.053048	0.008294	6.396
Vega, Norway	Chinese	Fereydunkenar, Iran	0.053403	0.007786	6.859
Turkey2	Chinese	Fereydunkenar, Iran	0.181089	0.025862	7.002
Gilan, Iran	Chinese	Fereydunkenar, Iran	0.043696	0.005929	7.37
Northern Finland	Chinese	Fereydunkenar, Iran	0.05589	0.007443	7.51
Smola, Norway	Chinese	Fereydunkenar, Iran	0.058765	0.00761	7.722
Netherlands	Chinese	Fereydunkenar, Iran	0.08845	0.010951	8.077
Southern Finland	Chinese	Fereydunkenar, Iran	0.058875	0.007199	8.178
Turkey1	Chinese	Fereydunkenar, Iran	0.732017	0.047384	15.449
Russia	Chinese	Gilan, Iran	0.039034	0.011451	3.409
Kazakhstan	Chinese	Gilan, Iran	0.03761	0.009016	4.171
Greece	Chinese	Gilan, Iran	0.051815	0.010332	5.015
Fereydunkenar, Iran	Chinese	Gilan, Iran	0.04798	0.007035	6.82
Turkey2	Chinese	Gilan, Iran	0.170017	0.024673	6.891
Denmark	Chinese	Gilan, Iran	0.052496	0.007489	7.009
Vega, Norway	Chinese	Gilan, Iran	0.050585	0.007057	7.168
Smola, Norway	Chinese	Gilan, Iran	0.052796	0.006996	7.546
Northern Finland	Chinese	Gilan, Iran	0.048645	0.006364	7.644
Netherlands	Chinese	Gilan, Iran	0.08435	0.010088	8.361
Southern Finland	Chinese	Gilan, Iran	0.055315	0.005348	10.343
Turkey1	Chinese	Gilan, Iran	0.707974	0.043951	16.108
Russia	Chinese	Greece	0.05884	0.024788	2.374
Denmark	Chinese	Greece	0.052268	0.021849	2.392
Kazakhstan	Chinese	Greece	0.055154	0.021835	2.526
Southern Finland	Chinese	Greece	0.053805	0.021254	2.532
Vega, Norway	Chinese	Greece	0.052892	0.020591	2.569
Smola, Norway	Chinese	Greece	0.057911	0.021874	2.648
Northern Finland	Chinese	Greece	0.060336	0.021141	2.854
Fereydunkenar, Iran	Chinese	Greece	0.067805	0.022648	2.994
Gilan, Iran	Chinese	Greece	0.060869	0.020131	3.024
Netherlands	Chinese	Greece	0.084116	0.023119	3.638
Turkey2	Chinese	Greece	0.184616	0.034906	5.289
Turkey1	Chinese	Greece	0.765707	0.068942	11.106
Greece	Chinese	Kazakhstan	0.043955	0.013565	3.24
Gilan, Iran	Chinese	Kazakhstan	0.034522	0.00918	3.761
Fereydunkenar, Iran	Chinese	Kazakhstan	0.04068	0.010507	3.872
Denmark	Chinese	Kazakhstan	0.043118	0.010563	4.082
Northern Finland	Chinese	Kazakhstan	0.041543	0.009451	4.396
Vega, Norway	Chinese	Kazakhstan	0.039676	0.008283	4.79
Smola, Norway	Chinese	Kazakhstan	0.046462	0.009596	4.842
Southern Finland	Chinese	Kazakhstan	0.04873	0.008236	5.917
Netherlands	Chinese	Kazakhstan	0.076494	0.012695	6.026
Turkey2	Chinese	Kazakhstan	0.161893	0.022581	7.169
Turkey1	Chinese	Kazakhstan	0.71493	0.051303	13.936
Turkey2	Chinese	Netherlands	0.116002	0.023868	4.86
Turkey1	Chinese	Netherlands	0.610641	0.044865	13.611
Vega, Norway	Chinese	Northern Finland	0.022274	0.0077	2.893
Russia	Chinese	Northern Finland	0.040545	0.011022	3.679
Kazakhstan	Chinese	Northern Finland	0.033058	0.008529	3.876
Greece	Chinese	Northern Finland	0.039851	0.009531	4.181
Denmark	Chinese	Northern Finland	0.03201	0.007368	4.344
Smola, Norway	Chinese	Northern Finland	0.032139	0.006644	4.838
Southern Finland	Chinese	Northern Finland	0.030278	0.00576	5.256
Gilan, Iran	Chinese	Northern Finland	0.036524	0.005914	6.176
Turkey2	Chinese	Northern Finland	0.168964	0.025783	6.553
Fereydunkenar, Iran	Chinese	Northern Finland	0.047625	0.00622	7.656
Netherlands	Chinese	Northern Finland	0.064582	0.00818	7.896
Turkey1	Chinese	Northern Finland	0.692389	0.046826	14.786
Kazakhstan	Chinese	Russia	0.30269	0.036299	8.339
Greece	Chinese	Russia	0.301964	0.036209	8.34
Turkey2	Chinese	Russia	0.553088	0.061257	9.029
Denmark	Chinese	Russia	0.315991	0.034536	9.15
Vega, Norway	Chinese	Russia	0.334648	0.035588	9.403
Northern Finland	Chinese	Russia	0.333963	0.035385	9.438
Gilan, Iran	Chinese	Russia	0.321784	0.034062	9.447
Fereydunkenar, Iran	Chinese	Russia	0.322018	0.033663	9.566
Southern Finland	Chinese	Russia	0.343468	0.034381	9.99
Smola, Norway	Chinese	Russia	0.332693	0.033133	10.041
Netherlands	Chinese	Russia	0.386367	0.036798	10.5
Turkey1	Chinese	Russia	1.41653	0.11022	12.852
Russia	Chinese	Smola, Norway	0.032746	0.011491	2.85
Greece	Chinese	Smola, Norway	0.038188	0.011306	3.378
Denmark	Chinese	Smola, Norway	0.036239	0.008883	4.079
Northern Finland	Chinese	Smola, Norway	0.032128	0.00761	4.222
Kazakhstan	Chinese	Smola, Norway	0.037685	0.008261	4.562
Southern Finland	Chinese	Smola, Norway	0.035453	0.006265	5.659
Gilan, Iran	Chinese	Smola, Norway	0.040599	0.006429	6.315
Fereydunkenar, Iran	Chinese	Smola, Norway	0.049599	0.007307	6.788
Turkey2	Chinese	Smola, Norway	0.167893	0.02354	7.132
Netherlands	Chinese	Smola, Norway	0.066694	0.009085	7.341
Turkey1	Chinese	Smola, Norway	0.693262	0.042061	16.482
Smola, Norway	Chinese	Southern Finland	0.014015	0.005374	2.608
Kazakhstan	Chinese	Southern Finland	0.0186	0.006873	2.706
Denmark	Chinese	Southern Finland	0.016811	0.005673	2.964
Gilan, Iran	Chinese	Southern Finland	0.020916	0.004919	4.252
Fereydunkenar, Iran	Chinese	Southern Finland	0.027936	0.005499	5.08
Netherlands	Chinese	Southern Finland	0.046149	0.008482	5.44
Turkey2	Chinese	Southern Finland	0.140905	0.021551	6.538
Turkey1	Chinese	Southern Finland	0.653904	0.042221	15.488
Russia	Chinese	Turkey1	0.193848	0.059902	3.236
Vega, Norway	Chinese	Turkey1	0.186617	0.055557	3.359
Kazakhstan	Chinese	Turkey1	0.18624	0.054695	3.405
Gilan, Iran	Chinese	Turkey1	0.195584	0.056706	3.449
Northern Finland	Chinese	Turkey1	0.197202	0.05717	3.449
Denmark	Chinese	Turkey1	0.194439	0.055771	3.486
Fereydunkenar, Iran	Chinese	Turkey1	0.197678	0.05623	3.515
Southern Finland	Chinese	Turkey1	0.195681	0.055668	3.515
Smola, Norway	Chinese	Turkey1	0.196709	0.055205	3.563
Greece	Chinese	Turkey1	0.204578	0.05697	3.591
Turkey2	Chinese	Turkey1	0.195902	0.051054	3.837
Netherlands	Chinese	Turkey1	0.222601	0.056144	3.965
Russia	Chinese	Turkey2	0.192389	0.082145	2.342
Kazakhstan	Chinese	Turkey2	0.198988	0.081213	2.45
Greece	Chinese	Turkey2	0.211829	0.085346	2.482
Vega, Norway	Chinese	Turkey2	0.21207	0.083304	2.546
Gilan, Iran	Chinese	Turkey2	0.210797	0.081422	2.589
Smola, Norway	Chinese	Turkey2	0.226712	0.087222	2.599
Southern Finland	Chinese	Turkey2	0.223089	0.084052	2.654
Denmark	Chinese	Turkey2	0.225924	0.084401	2.677
Northern Finland	Chinese	Turkey2	0.227087	0.08447	2.688
Fereydunkenar, Iran	Chinese	Turkey2	0.228126	0.082838	2.754
Netherlands	Chinese	Turkey2	0.247187	0.088893	2.781
Turkey1	Chinese	Turkey2	0.928458	0.193244	4.805
Russia	Chinese	Vega, Norway	0.059701	0.01169	5.107
Smola, Norway	Chinese	Vega, Norway	0.043159	0.007434	5.806
Greece	Chinese	Vega, Norway	0.065894	0.011033	5.972
Kazakhstan	Chinese	Vega, Norway	0.065846	0.010121	6.506
Northern Finland	Chinese	Vega, Norway	0.056171	0.008062	6.967
Netherlands	Chinese	Vega, Norway	0.095173	0.012526	7.598
Denmark	Chinese	Vega, Norway	0.061058	0.007962	7.668
Turkey2	Chinese	Vega, Norway	0.196859	0.02441	8.065
Gilan, Iran	Chinese	Vega, Norway	0.072833	0.008008	9.095
Fereydunkenar, Iran	Chinese	Vega, Norway	0.079847	0.008664	9.216
Southern Finland	Chinese	Vega, Norway	0.064951	0.007029	9.24
Turkey1	Chinese	Vega, Norway	0.739819	0.046532	15.899
Russia	Domestic N-Turkey	Denmark	0.055565	0.010555	5.264
Greece	Domestic N-Turkey	Denmark	0.053149	0.009673	5.495
Northern Finland	Domestic N-Turkey	Denmark	0.048867	0.008209	5.953
Netherlands	Domestic N-Turkey	Denmark	0.064848	0.009865	6.573
Vega, Norway	Domestic N-Turkey	Denmark	0.054625	0.007582	7.205
Southern Finland	Domestic N-Turkey	Denmark	0.05189	0.006929	7.489
Fereydunkenar, Iran	Domestic N-Turkey	Denmark	0.061108	0.008142	7.505
Smola, Norway	Domestic N-Turkey	Denmark	0.054761	0.007183	7.623
Kazakhstan	Domestic N-Turkey	Denmark	0.066052	0.00775	8.523
Gilan, Iran	Domestic N-Turkey	Denmark	0.068495	0.008025	8.535
Turkey2	Domestic N-Turkey	Denmark	0.145808	0.016641	8.762
Turkey1	Domestic N-Turkey	Denmark	0.141125	0.013117	10.759
Russia	Domestic N-Turkey	Fereydunkenar, Iran	0.052749	0.009782	5.393
Greece	Domestic N-Turkey	Fereydunkenar, Iran	0.059967	0.009634	6.224
Kazakhstan	Domestic N-Turkey	Fereydunkenar, Iran	0.055277	0.006343	8.715
Denmark	Domestic N-Turkey	Fereydunkenar, Iran	0.053373	0.006016	8.872
Turkey2	Domestic N-Turkey	Fereydunkenar, Iran	0.135337	0.014152	9.563
Northern Finland	Domestic N-Turkey	Fereydunkenar, Iran	0.056103	0.005812	9.652
Smola, Norway	Domestic N-Turkey	Fereydunkenar, Iran	0.060747	0.006197	9.803
Turkey1	Domestic N-Turkey	Fereydunkenar, Iran	0.134139	0.013209	10.155
Gilan, Iran	Domestic N-Turkey	Fereydunkenar, Iran	0.055938	0.00516	10.841
Southern Finland	Domestic N-Turkey	Fereydunkenar, Iran	0.05599	0.005037	11.116
Vega, Norway	Domestic N-Turkey	Fereydunkenar, Iran	0.065338	0.005649	11.567
Netherlands	Domestic N-Turkey	Fereydunkenar, Iran	0.075032	0.00627	11.966
Russia	Domestic N-Turkey	Gilan, Iran	0.044193	0.009035	4.892
Greece	Domestic N-Turkey	Gilan, Iran	0.044719	0.00777	5.755
Kazakhstan	Domestic N-Turkey	Gilan, Iran	0.041985	0.005853	7.174
Northern Finland	Domestic N-Turkey	Gilan, Iran	0.037913	0.005185	7.311
Denmark	Domestic N-Turkey	Gilan, Iran	0.041776	0.005438	7.682
Smola, Norway	Domestic N-Turkey	Gilan, Iran	0.043215	0.005112	8.454
Turkey1	Domestic N-Turkey	Gilan, Iran	0.118704	0.013705	8.661
Fereydunkenar, Iran	Domestic N-Turkey	Gilan, Iran	0.037424	0.004137	9.047
Netherlands	Domestic N-Turkey	Gilan, Iran	0.059917	0.006575	9.113
Vega, Norway	Domestic N-Turkey	Gilan, Iran	0.050499	0.005493	9.193
Turkey2	Domestic N-Turkey	Gilan, Iran	0.113063	0.011427	9.894
Southern Finland	Domestic N-Turkey	Gilan, Iran	0.040972	0.003933	10.418
Denmark	Domestic N-Turkey	Greece	0.047714	0.021567	2.212
Southern Finland	Domestic N-Turkey	Greece	0.045821	0.02031	2.256
Russia	Domestic N-Turkey	Greece	0.059874	0.025707	2.329
Northern Finland	Domestic N-Turkey	Greece	0.055629	0.020885	2.664
Smola, Norway	Domestic N-Turkey	Greece	0.054831	0.01965	2.79
Vega, Norway	Domestic N-Turkey	Greece	0.058635	0.020251	2.895
Netherlands	Domestic N-Turkey	Greece	0.065399	0.021957	2.978
Fereydunkenar, Iran	Domestic N-Turkey	Greece	0.062746	0.020739	3.026
Kazakhstan	Domestic N-Turkey	Greece	0.066997	0.020821	3.218
Gilan, Iran	Domestic N-Turkey	Greece	0.066527	0.020243	3.286
Turkey1	Domestic N-Turkey	Greece	0.156406	0.032641	4.792
Turkey2	Domestic N-Turkey	Greece	0.132187	0.025593	5.165
Fereydunkenar, Iran	Domestic N-Turkey	Kazakhstan	0.026633	0.007891	3.375
Greece	Domestic N-Turkey	Kazakhstan	0.034468	0.010152	3.395
Denmark	Domestic N-Turkey	Kazakhstan	0.029608	0.008079	3.665
Northern Finland	Domestic N-Turkey	Kazakhstan	0.028075	0.007375	3.807
Smola, Norway	Domestic N-Turkey	Kazakhstan	0.03399	0.007906	4.299
Gilan, Iran	Domestic N-Turkey	Kazakhstan	0.031959	0.00728	4.39
Southern Finland	Domestic N-Turkey	Kazakhstan	0.031762	0.006516	4.875
Vega, Norway	Domestic N-Turkey	Kazakhstan	0.036833	0.007194	5.12
Netherlands	Domestic N-Turkey	Kazakhstan	0.048844	0.007769	6.287
Turkey2	Domestic N-Turkey	Kazakhstan	0.101949	0.015486	6.583
Turkey1	Domestic N-Turkey	Kazakhstan	0.111153	0.0155	7.171
Denmark	Domestic N-Turkey	Netherlands	0.01541	0.006196	2.487
Greece	Domestic N-Turkey	Netherlands	0.020855	0.007427	2.808
Northern Finland	Domestic N-Turkey	Netherlands	0.017707	0.00531	3.335
Smola, Norway	Domestic N-Turkey	Netherlands	0.021835	0.005709	3.824
Southern Finland	Domestic N-Turkey	Netherlands	0.019975	0.004737	4.216
Vega, Norway	Domestic N-Turkey	Netherlands	0.023687	0.005571	4.252
Russia	Domestic N-Turkey	Netherlands	0.031509	0.006729	4.683
Kazakhstan	Domestic N-Turkey	Netherlands	0.034973	0.007176	4.873
Fereydunkenar, Iran	Domestic N-Turkey	Netherlands	0.032178	0.006097	5.277
Gilan, Iran	Domestic N-Turkey	Netherlands	0.035806	0.005915	6.054
Turkey2	Domestic N-Turkey	Netherlands	0.088069	0.013319	6.612
Turkey1	Domestic N-Turkey	Netherlands	0.088754	0.01218	7.287
Greece	Domestic N-Turkey	Northern Finland	0.044121	0.009543	4.623
Russia	Domestic N-Turkey	Northern Finland	0.049907	0.010441	4.78
Southern Finland	Domestic N-Turkey	Northern Finland	0.026535	0.005304	5.003
Vega, Norway	Domestic N-Turkey	Northern Finland	0.032884	0.006516	5.047
Denmark	Domestic N-Turkey	Northern Finland	0.03197	0.005876	5.441
Smola, Norway	Domestic N-Turkey	Northern Finland	0.033504	0.006133	5.463
Kazakhstan	Domestic N-Turkey	Northern Finland	0.047835	0.007503	6.376
Fereydunkenar, Iran	Domestic N-Turkey	Northern Finland	0.047203	0.007335	6.435
Netherlands	Domestic N-Turkey	Northern Finland	0.050221	0.007741	6.487
Gilan, Iran	Domestic N-Turkey	Northern Finland	0.047538	0.006079	7.82
Turkey1	Domestic N-Turkey	Northern Finland	0.119504	0.014361	8.321
Turkey2	Domestic N-Turkey	Northern Finland	0.124733	0.014731	8.467
Greece	Domestic N-Turkey	Russia	0.302394	0.037503	8.063
Kazakhstan	Domestic N-Turkey	Russia	0.314899	0.036952	8.522
Smola, Norway	Domestic N-Turkey	Russia	0.319211	0.035831	8.909
Denmark	Domestic N-Turkey	Russia	0.301991	0.033803	8.934
Fereydunkenar, Iran	Domestic N-Turkey	Russia	0.306168	0.033565	9.122
Gilan, Iran	Domestic N-Turkey	Russia	0.32124	0.034052	9.434
Vega, Norway	Domestic N-Turkey	Russia	0.329852	0.034916	9.447
Netherlands	Domestic N-Turkey	Russia	0.343653	0.036041	9.535
Northern Finland	Domestic N-Turkey	Russia	0.321964	0.033749	9.54
Turkey2	Domestic N-Turkey	Russia	0.450379	0.046927	9.597
Southern Finland	Domestic N-Turkey	Russia	0.320178	0.032703	9.79
Turkey1	Domestic N-Turkey	Russia	0.443023	0.042759	10.361
Vega, Norway	Domestic N-Turkey	Smola, Norway	0.019217	0.005822	3.301
Greece	Domestic N-Turkey	Smola, Norway	0.040388	0.009623	4.197
Denmark	Domestic N-Turkey	Smola, Norway	0.035056	0.007058	4.967
Russia	Domestic N-Turkey	Smola, Norway	0.042352	0.00844	5.018
Southern Finland	Domestic N-Turkey	Smola, Norway	0.03103	0.004935	6.288
Fereydunkenar, Iran	Domestic N-Turkey	Smola, Norway	0.048578	0.007511	6.467
Northern Finland	Domestic N-Turkey	Smola, Norway	0.030529	0.004413	6.918
Kazakhstan	Domestic N-Turkey	Smola, Norway	0.051128	0.007388	6.92
Netherlands	Domestic N-Turkey	Smola, Norway	0.051964	0.007041	7.38
Gilan, Iran	Domestic N-Turkey	Smola, Norway	0.050312	0.00578	8.705
Turkey2	Domestic N-Turkey	Smola, Norway	0.122166	0.013515	9.039
Turkey1	Domestic N-Turkey	Smola, Norway	0.119204	0.011283	10.565
Northern Finland	Domestic N-Turkey	Southern Finland	0.01139	0.004111	2.77
Greece	Domestic N-Turkey	Southern Finland	0.019506	0.006158	3.168
Denmark	Domestic N-Turkey	Southern Finland	0.020441	0.005292	3.863
Smola, Norway	Domestic N-Turkey	Southern Finland	0.018765	0.004392	4.273
Russia	Domestic N-Turkey	Southern Finland	0.032375	0.007011	4.618
Vega, Norway	Domestic N-Turkey	Southern Finland	0.022031	0.004136	5.326
Fereydunkenar, Iran	Domestic N-Turkey	Southern Finland	0.03138	0.005287	5.935
Kazakhstan	Domestic N-Turkey	Southern Finland	0.036388	0.006018	6.047
Netherlands	Domestic N-Turkey	Southern Finland	0.036623	0.004901	7.473
Turkey2	Domestic N-Turkey	Southern Finland	0.099829	0.012693	7.865
Gilan, Iran	Domestic N-Turkey	Southern Finland	0.034809	0.004033	8.631
Turkey1	Domestic N-Turkey	Southern Finland	0.101599	0.011696	8.687
Russia	Domestic N-Turkey	Turkey1	0.909735	0.139116	6.539
Greece	Domestic N-Turkey	Turkey1	0.930865	0.141386	6.584
Turkey2	Domestic N-Turkey	Turkey1	0.85212	0.129387	6.586
Northern Finland	Domestic N-Turkey	Turkey1	0.916436	0.138319	6.626
Southern Finland	Domestic N-Turkey	Turkey1	0.911233	0.137427	6.631
Fereydunkenar, Iran	Domestic N-Turkey	Turkey1	0.914143	0.137596	6.644
Kazakhstan	Domestic N-Turkey	Turkey1	0.92398	0.138879	6.653
Gilan, Iran	Domestic N-Turkey	Turkey1	0.928145	0.138552	6.699
Vega, Norway	Domestic N-Turkey	Turkey1	0.917042	0.136718	6.708
Smola, Norway	Domestic N-Turkey	Turkey1	0.918668	0.136913	6.71
Denmark	Domestic N-Turkey	Turkey1	0.914844	0.13615	6.719
Netherlands	Domestic N-Turkey	Turkey1	0.923723	0.136896	6.748
Turkey1	Domestic N-Turkey	Turkey2	0.216448	0.086801	2.494
Russia	Domestic N-Turkey	Turkey2	0.286116	0.074614	3.835
Kazakhstan	Domestic N-Turkey	Turkey2	0.286604	0.07299	3.927
Greece	Domestic N-Turkey	Turkey2	0.286162	0.072724	3.935
Southern Finland	Domestic N-Turkey	Turkey2	0.286021	0.072465	3.947
Vega, Norway	Domestic N-Turkey	Turkey2	0.294013	0.074181	3.963
Smola, Norway	Domestic N-Turkey	Turkey2	0.298434	0.075253	3.966
Denmark	Domestic N-Turkey	Turkey2	0.296648	0.074764	3.968
Northern Finland	Domestic N-Turkey	Turkey2	0.295613	0.074355	3.976
Netherlands	Domestic N-Turkey	Turkey2	0.298577	0.074826	3.99
Fereydunkenar, Iran	Domestic N-Turkey	Turkey2	0.296533	0.073661	4.026
Gilan, Iran	Domestic N-Turkey	Turkey2	0.293277	0.072198	4.062
Smola, Norway	Domestic N-Turkey	Vega, Norway	0.034528	0.006721	5.137
Denmark	Domestic N-Turkey	Vega, Norway	0.050829	0.00819	6.206
Russia	Domestic N-Turkey	Vega, Norway	0.061901	0.009901	6.252
Northern Finland	Domestic N-Turkey	Vega, Norway	0.045656	0.006905	6.612
Greece	Domestic N-Turkey	Vega, Norway	0.059612	0.008854	6.733
Fereydunkenar, Iran	Domestic N-Turkey	Vega, Norway	0.069608	0.008531	8.16
Southern Finland	Domestic N-Turkey	Vega, Norway	0.050475	0.006053	8.338
Kazakhstan	Domestic N-Turkey	Vega, Norway	0.070318	0.008014	8.775
Turkey2	Domestic N-Turkey	Vega, Norway	0.137785	0.015381	8.958
Turkey1	Domestic N-Turkey	Vega, Norway	0.139263	0.015174	9.178
Netherlands	Domestic N-Turkey	Vega, Norway	0.070124	0.007478	9.377
Gilan, Iran	Domestic N-Turkey	Vega, Norway	0.073602	0.007783	9.457
Northern Finland	Domestic NE-Turkey	Denmark	0.051127	0.009336	5.476
Greece	Domestic NE-Turkey	Denmark	0.056738	0.010203	5.561
Russia	Domestic NE-Turkey	Denmark	0.066276	0.010542	6.287
Smola, Norway	Domestic NE-Turkey	Denmark	0.054252	0.008368	6.483
Netherlands	Domestic NE-Turkey	Denmark	0.066575	0.009614	6.924
Turkey2	Domestic NE-Turkey	Denmark	0.12929	0.018372	7.037
Southern Finland	Domestic NE-Turkey	Denmark	0.054759	0.007701	7.111
Vega, Norway	Domestic NE-Turkey	Denmark	0.055253	0.00739	7.477
Kazakhstan	Domestic NE-Turkey	Denmark	0.070118	0.008529	8.221
Fereydunkenar, Iran	Domestic NE-Turkey	Denmark	0.066077	0.008024	8.235
Turkey1	Domestic NE-Turkey	Denmark	0.113379	0.012915	8.779
Gilan, Iran	Domestic NE-Turkey	Denmark	0.075424	0.008178	9.223
Greece	Domestic NE-Turkey	Fereydunkenar, Iran	0.058685	0.010617	5.528
Russia	Domestic NE-Turkey	Fereydunkenar, Iran	0.06171	0.010617	5.812
Kazakhstan	Domestic NE-Turkey	Fereydunkenar, Iran	0.054725	0.00786	6.963
Turkey1	Domestic NE-Turkey	Fereydunkenar, Iran	0.099303	0.013635	7.283
Smola, Norway	Domestic NE-Turkey	Fereydunkenar, Iran	0.054926	0.007538	7.287
Turkey2	Domestic NE-Turkey	Fereydunkenar, Iran	0.114009	0.015235	7.483
Denmark	Domestic NE-Turkey	Fereydunkenar, Iran	0.047896	0.006351	7.541
Northern Finland	Domestic NE-Turkey	Fereydunkenar, Iran	0.053209	0.006408	8.304
Vega, Norway	Domestic NE-Turkey	Fereydunkenar, Iran	0.060459	0.006918	8.739
Southern Finland	Domestic NE-Turkey	Fereydunkenar, Iran	0.053692	0.005914	9.078
Gilan, Iran	Domestic NE-Turkey	Fereydunkenar, Iran	0.057774	0.005844	9.886
Netherlands	Domestic NE-Turkey	Fereydunkenar, Iran	0.071657	0.006571	10.904
Greece	Domestic NE-Turkey	Gilan, Iran	0.042026	0.008497	4.946
Russia	Domestic NE-Turkey	Gilan, Iran	0.04757	0.008604	5.529
Northern Finland	Domestic NE-Turkey	Gilan, Iran	0.033624	0.005695	5.905
Smola, Norway	Domestic NE-Turkey	Gilan, Iran	0.036212	0.005834	6.207
Turkey1	Domestic NE-Turkey	Gilan, Iran	0.084335	0.013406	6.291
Denmark	Domestic NE-Turkey	Gilan, Iran	0.035024	0.005542	6.32
Kazakhstan	Domestic NE-Turkey	Gilan, Iran	0.039815	0.006201	6.42
Fereydunkenar, Iran	Domestic NE-Turkey	Gilan, Iran	0.035843	0.005257	6.818
Turkey2	Domestic NE-Turkey	Gilan, Iran	0.090249	0.013113	6.883
Vega, Norway	Domestic NE-Turkey	Gilan, Iran	0.044413	0.005939	7.478
Southern Finland	Domestic NE-Turkey	Gilan, Iran	0.037023	0.004683	7.906
Netherlands	Domestic NE-Turkey	Gilan, Iran	0.055032	0.006727	8.181
Southern Finland	Domestic NE-Turkey	Greece	0.045022	0.02195	2.051
Northern Finland	Domestic NE-Turkey	Greece	0.053799	0.022821	2.357
Smola, Norway	Domestic NE-Turkey	Greece	0.05045	0.0214	2.357
Russia	Domestic NE-Turkey	Greece	0.067895	0.027914	2.432
Vega, Norway	Domestic NE-Turkey	Greece	0.054842	0.022048	2.487
Netherlands	Domestic NE-Turkey	Greece	0.063567	0.023833	2.667
Fereydunkenar, Iran	Domestic NE-Turkey	Greece	0.063786	0.023505	2.714
Kazakhstan	Domestic NE-Turkey	Greece	0.067755	0.022318	3.036
Gilan, Iran	Domestic NE-Turkey	Greece	0.069573	0.021995	3.163
Turkey1	Domestic NE-Turkey	Greece	0.122976	0.031421	3.914
Turkey2	Domestic NE-Turkey	Greece	0.111898	0.027914	4.009
Russia	Domestic NE-Turkey	Kazakhstan	0.025686	0.010501	2.446
Denmark	Domestic NE-Turkey	Kazakhstan	0.025595	0.008744	2.927
Greece	Domestic NE-Turkey	Kazakhstan	0.033645	0.011071	3.039
Fereydunkenar, Iran	Domestic NE-Turkey	Kazakhstan	0.027101	0.008871	3.055
Northern Finland	Domestic NE-Turkey	Kazakhstan	0.025913	0.008141	3.183
Smola, Norway	Domestic NE-Turkey	Kazakhstan	0.029075	0.00814	3.572
Vega, Norway	Domestic NE-Turkey	Kazakhstan	0.033353	0.008159	4.088
Southern Finland	Domestic NE-Turkey	Kazakhstan	0.030322	0.007207	4.207
Gilan, Iran	Domestic NE-Turkey	Kazakhstan	0.034293	0.007567	4.532
Turkey2	Domestic NE-Turkey	Kazakhstan	0.081809	0.016375	4.996
Turkey1	Domestic NE-Turkey	Kazakhstan	0.078086	0.015231	5.127
Netherlands	Domestic NE-Turkey	Kazakhstan	0.046541	0.008331	5.587
Denmark	Domestic NE-Turkey	Netherlands	0.013852	0.006478	2.138
Greece	Domestic NE-Turkey	Netherlands	0.023142	0.008846	2.616
Smola, Norway	Domestic NE-Turkey	Netherlands	0.019881	0.006152	3.232
Northern Finland	Domestic NE-Turkey	Netherlands	0.018757	0.005765	3.254
Vega, Norway	Domestic NE-Turkey	Netherlands	0.022541	0.005633	4.002
Southern Finland	Domestic NE-Turkey	Netherlands	0.021232	0.004784	4.438
Kazakhstan	Domestic NE-Turkey	Netherlands	0.037506	0.008075	4.645
Russia	Domestic NE-Turkey	Netherlands	0.039006	0.007781	5.013
Turkey2	Domestic NE-Turkey	Netherlands	0.071687	0.01401	5.117
Fereydunkenar, Iran	Domestic NE-Turkey	Netherlands	0.035481	0.006511	5.449
Turkey1	Domestic NE-Turkey	Netherlands	0.062085	0.010993	5.648
Gilan, Iran	Domestic NE-Turkey	Netherlands	0.040746	0.006355	6.412
Smola, Norway	Domestic NE-Turkey	Northern Finland	0.031062	0.007152	4.343
Denmark	Domestic NE-Turkey	Northern Finland	0.030047	0.006888	4.362
Greece	Domestic NE-Turkey	Northern Finland	0.045957	0.009997	4.597
Southern Finland	Domestic NE-Turkey	Northern Finland	0.027691	0.005965	4.643
Russia	Domestic NE-Turkey	Northern Finland	0.056747	0.011488	4.94
Vega, Norway	Domestic NE-Turkey	Northern Finland	0.031581	0.006168	5.12
Netherlands	Domestic NE-Turkey	Northern Finland	0.05058	0.00823	6.146
Kazakhstan	Domestic NE-Turkey	Northern Finland	0.05066	0.008155	6.212
Fereydunkenar, Iran	Domestic NE-Turkey	Northern Finland	0.050428	0.00787	6.408
Turkey1	Domestic NE-Turkey	Northern Finland	0.089068	0.013318	6.688
Turkey2	Domestic NE-Turkey	Northern Finland	0.106263	0.015547	6.835
Gilan, Iran	Domestic NE-Turkey	Northern Finland	0.052634	0.006615	7.956
Greece	Domestic NE-Turkey	Russia	0.290217	0.035874	8.09
Kazakhstan	Domestic NE-Turkey	Russia	0.303844	0.035055	8.668
Fereydunkenar, Iran	Domestic NE-Turkey	Russia	0.292308	0.031664	9.232
Denmark	Domestic NE-Turkey	Russia	0.285266	0.030874	9.24
Smola, Norway	Domestic NE-Turkey	Russia	0.298897	0.031909	9.367
Turkey2	Domestic NE-Turkey	Russia	0.409241	0.043473	9.414
Vega, Norway	Domestic NE-Turkey	Russia	0.315451	0.033486	9.42
Netherlands	Domestic NE-Turkey	Russia	0.330849	0.035045	9.441
Northern Finland	Domestic NE-Turkey	Russia	0.310896	0.032754	9.492
Gilan, Iran	Domestic NE-Turkey	Russia	0.315899	0.032077	9.848
Turkey1	Domestic NE-Turkey	Russia	0.384276	0.038935	9.87
Southern Finland	Domestic NE-Turkey	Russia	0.305995	0.030929	9.894
Vega, Norway	Domestic NE-Turkey	Smola, Norway	0.020096	0.005945	3.381
Greece	Domestic NE-Turkey	Smola, Norway	0.044018	0.009956	4.421
Denmark	Domestic NE-Turkey	Smola, Norway	0.035135	0.007573	4.639
Russia	Domestic NE-Turkey	Smola, Norway	0.054858	0.009893	5.545
Southern Finland	Domestic NE-Turkey	Smola, Norway	0.034166	0.005752	5.94
Northern Finland	Domestic NE-Turkey	Smola, Norway	0.03276	0.005381	6.088
Fereydunkenar, Iran	Domestic NE-Turkey	Smola, Norway	0.053648	0.008751	6.13
Kazakhstan	Domestic NE-Turkey	Smola, Norway	0.055494	0.008194	6.773
Netherlands	Domestic NE-Turkey	Smola, Norway	0.05382	0.007277	7.396
Turkey2	Domestic NE-Turkey	Smola, Norway	0.107429	0.014435	7.442
Turkey1	Domestic NE-Turkey	Smola, Norway	0.090722	0.011575	7.838
Gilan, Iran	Domestic NE-Turkey	Smola, Norway	0.057365	0.006853	8.371
Northern Finland	Domestic NE-Turkey	Southern Finland	0.01103	0.004376	2.521
Greece	Domestic NE-Turkey	Southern Finland	0.020168	0.006644	3.035
Denmark	Domestic NE-Turkey	Southern Finland	0.017694	0.005223	3.388
Smola, Norway	Domestic NE-Turkey	Southern Finland	0.015797	0.004041	3.909
Vega, Norway	Domestic NE-Turkey	Southern Finland	0.019908	0.004213	4.725
Russia	Domestic NE-Turkey	Southern Finland	0.040867	0.007586	5.387
Turkey2	Domestic NE-Turkey	Southern Finland	0.081958	0.014089	5.817
Kazakhstan	Domestic NE-Turkey	Southern Finland	0.037912	0.006442	5.885
Fereydunkenar, Iran	Domestic NE-Turkey	Southern Finland	0.033545	0.005602	5.988
Turkey1	Domestic NE-Turkey	Southern Finland	0.072256	0.010828	6.673
Netherlands	Domestic NE-Turkey	Southern Finland	0.035704	0.005223	6.835
Gilan, Iran	Domestic NE-Turkey	Southern Finland	0.038542	0.004787	8.052
Russia	Domestic NE-Turkey	Turkey1	0.952661	0.145177	6.562
Turkey2	Domestic NE-Turkey	Turkey1	0.868545	0.130565	6.652
Greece	Domestic NE-Turkey	Turkey1	0.970295	0.145151	6.685
Southern Finland	Domestic NE-Turkey	Turkey1	0.948851	0.141365	6.712
Kazakhstan	Domestic NE-Turkey	Turkey1	0.964184	0.143526	6.718
Northern Finland	Domestic NE-Turkey	Turkey1	0.954235	0.142028	6.719
Fereydunkenar, Iran	Domestic NE-Turkey	Turkey1	0.955614	0.141447	6.756
Gilan, Iran	Domestic NE-Turkey	Turkey1	0.970351	0.14322	6.775
Smola, Norway	Domestic NE-Turkey	Turkey1	0.954062	0.140791	6.776
Vega, Norway	Domestic NE-Turkey	Turkey1	0.952682	0.140516	6.78
Denmark	Domestic NE-Turkey	Turkey1	0.948502	0.139876	6.781
Netherlands	Domestic NE-Turkey	Turkey1	0.959042	0.140516	6.825
Turkey1	Domestic NE-Turkey	Turkey2	0.198695	0.082915	2.396
Smola, Norway	Domestic NE-Turkey	Turkey2	0.318543	0.077156	4.129
Vega, Norway	Domestic NE-Turkey	Turkey2	0.316303	0.076353	4.143
Denmark	Domestic NE-Turkey	Turkey2	0.318505	0.076668	4.154
Southern Finland	Domestic NE-Turkey	Turkey2	0.311206	0.074811	4.16
Russia	Domestic NE-Turkey	Turkey2	0.320059	0.076853	4.165
Netherlands	Domestic NE-Turkey	Turkey2	0.322341	0.077106	4.181
Greece	Domestic NE-Turkey	Turkey2	0.312713	0.074766	4.183
Northern Finland	Domestic NE-Turkey	Turkey2	0.320714	0.076465	4.194
Kazakhstan	Domestic NE-Turkey	Turkey2	0.313801	0.07477	4.197
Fereydunkenar, Iran	Domestic NE-Turkey	Turkey2	0.324555	0.075915	4.275
Gilan, Iran	Domestic NE-Turkey	Turkey2	0.324039	0.074732	4.336
Smola, Norway	Domestic NE-Turkey	Vega, Norway	0.033431	0.006526	5.122
Denmark	Domestic NE-Turkey	Vega, Norway	0.050099	0.008176	6.127
Greece	Domestic NE-Turkey	Vega, Norway	0.062628	0.009311	6.726
Northern Finland	Domestic NE-Turkey	Vega, Norway	0.04719	0.006505	7.255
Turkey2	Domestic NE-Turkey	Vega, Norway	0.120825	0.01633	7.399
Russia	Domestic NE-Turkey	Vega, Norway	0.071051	0.009423	7.54
Fereydunkenar, Iran	Domestic NE-Turkey	Vega, Norway	0.073852	0.008688	8.5
Turkey1	Domestic NE-Turkey	Vega, Norway	0.10961	0.01289	8.504
Kazakhstan	Domestic NE-Turkey	Vega, Norway	0.07393	0.008192	9.024
Netherlands	Domestic NE-Turkey	Vega, Norway	0.070946	0.007775	9.125
Southern Finland	Domestic NE-Turkey	Vega, Norway	0.052662	0.005579	9.439
Gilan, Iran	Domestic NE-Turkey	Vega, Norway	0.079923	0.007688	10.396
Northern Finland	Domestic NW-Turkey	Denmark	0.050898	0.009483	5.367
Russia	Domestic NW-Turkey	Denmark	0.059149	0.01095	5.402
Greece	Domestic NW-Turkey	Denmark	0.061826	0.00973	6.354
Smola, Norway	Domestic NW-Turkey	Denmark	0.058154	0.009002	6.46
Netherlands	Domestic NW-Turkey	Denmark	0.071462	0.010856	6.583
Turkey1	Domestic NW-Turkey	Denmark	0.085479	0.012658	6.753
Southern Finland	Domestic NW-Turkey	Denmark	0.054566	0.007637	7.145
Kazakhstan	Domestic NW-Turkey	Denmark	0.066202	0.008841	7.488
Fereydunkenar, Iran	Domestic NW-Turkey	Denmark	0.06173	0.008242	7.49
Gilan, Iran	Domestic NW-Turkey	Denmark	0.068407	0.008795	7.778
Vega, Norway	Domestic NW-Turkey	Denmark	0.062912	0.007669	8.204
Turkey2	Domestic NW-Turkey	Denmark	0.154744	0.017484	8.851
Russia	Domestic NW-Turkey	Fereydunkenar, Iran	0.056915	0.011136	5.111
Turkey1	Domestic NW-Turkey	Fereydunkenar, Iran	0.075664	0.013263	5.705
Greece	Domestic NW-Turkey	Fereydunkenar, Iran	0.067854	0.010038	6.76
Kazakhstan	Domestic NW-Turkey	Fereydunkenar, Iran	0.054694	0.007009	7.803
Denmark	Domestic NW-Turkey	Fereydunkenar, Iran	0.052273	0.006421	8.141
Northern Finland	Domestic NW-Turkey	Fereydunkenar, Iran	0.057384	0.006576	8.726
Smola, Norway	Domestic NW-Turkey	Fereydunkenar, Iran	0.062947	0.006732	9.351
Gilan, Iran	Domestic NW-Turkey	Fereydunkenar, Iran	0.054831	0.005806	9.443
Turkey2	Domestic NW-Turkey	Fereydunkenar, Iran	0.144029	0.015066	9.56
Netherlands	Domestic NW-Turkey	Fereydunkenar, Iran	0.080839	0.007588	10.653
Southern Finland	Domestic NW-Turkey	Fereydunkenar, Iran	0.057674	0.005257	10.972
Vega, Norway	Domestic NW-Turkey	Fereydunkenar, Iran	0.072422	0.006532	11.087
Russia	Domestic NW-Turkey	Greece	0.054366	0.024071	2.259
Northern Finland	Domestic NW-Turkey	Greece	0.048108	0.020511	2.345
Smola, Norway	Domestic NW-Turkey	Greece	0.048881	0.019905	2.456
Fereydunkenar, Iran	Domestic NW-Turkey	Greece	0.053916	0.019842	2.717
Vega, Norway	Domestic NW-Turkey	Greece	0.056917	0.020698	2.75
Gilan, Iran	Domestic NW-Turkey	Greece	0.056754	0.019795	2.867
Kazakhstan	Domestic NW-Turkey	Greece	0.058181	0.020003	2.909
Netherlands	Domestic NW-Turkey	Greece	0.062828	0.02142	2.933
Turkey1	Domestic NW-Turkey	Greece	0.089265	0.026961	3.311
Turkey2	Domestic NW-Turkey	Greece	0.132105	0.027568	4.792
Denmark	Domestic NW-Turkey	Kazakhstan	0.029371	0.008706	3.374
Fereydunkenar, Iran	Domestic NW-Turkey	Kazakhstan	0.027126	0.007864	3.449
Greece	Domestic NW-Turkey	Kazakhstan	0.042203	0.011518	3.664
Northern Finland	Domestic NW-Turkey	Kazakhstan	0.030167	0.0082	3.679
Turkey1	Domestic NW-Turkey	Kazakhstan	0.052233	0.013729	3.805
Gilan, Iran	Domestic NW-Turkey	Kazakhstan	0.031819	0.008053	3.951
Smola, Norway	Domestic NW-Turkey	Kazakhstan	0.036709	0.008298	4.424
Southern Finland	Domestic NW-Turkey	Kazakhstan	0.034169	0.007044	4.851
Vega, Norway	Domestic NW-Turkey	Kazakhstan	0.044783	0.00798	5.612
Netherlands	Domestic NW-Turkey	Kazakhstan	0.055486	0.008835	6.28
Turkey2	Domestic NW-Turkey	Kazakhstan	0.1093	0.017112	6.388
Northern Finland	Domestic NW-Turkey	Netherlands	0.01429	0.005708	2.504
Greece	Domestic NW-Turkey	Netherlands	0.023172	0.007779	2.979
Southern Finland	Domestic NW-Turkey	Netherlands	0.016526	0.004856	3.403
Smola, Norway	Domestic NW-Turkey	Netherlands	0.018837	0.005487	3.433
Turkey1	Domestic NW-Turkey	Netherlands	0.031667	0.009102	3.479
Kazakhstan	Domestic NW-Turkey	Netherlands	0.029132	0.007901	3.687
Fereydunkenar, Iran	Domestic NW-Turkey	Netherlands	0.027156	0.007108	3.82
Russia	Domestic NW-Turkey	Netherlands	0.030008	0.007538	3.981
Gilan, Iran	Domestic NW-Turkey	Netherlands	0.029785	0.006979	4.268
Vega, Norway	Domestic NW-Turkey	Netherlands	0.025117	0.005312	4.729
Turkey2	Domestic NW-Turkey	Netherlands	0.090691	0.014257	6.361
Denmark	Domestic NW-Turkey	Northern Finland	0.030246	0.00703	4.303
Russia	Domestic NW-Turkey	Northern Finland	0.049995	0.010423	4.796
Smola, Norway	Domestic NW-Turkey	Northern Finland	0.034847	0.007181	4.853
Greece	Domestic NW-Turkey	Northern Finland	0.050732	0.01035	4.902
Southern Finland	Domestic NW-Turkey	Northern Finland	0.027485	0.005547	4.955
Kazakhstan	Domestic NW-Turkey	Northern Finland	0.046416	0.00867	5.354
Turkey1	Domestic NW-Turkey	Northern Finland	0.061928	0.011258	5.501
Fereydunkenar, Iran	Domestic NW-Turkey	Northern Finland	0.046404	0.007941	5.844
Vega, Norway	Domestic NW-Turkey	Northern Finland	0.039076	0.006371	6.134
Gilan, Iran	Domestic NW-Turkey	Northern Finland	0.045781	0.006933	6.603
Netherlands	Domestic NW-Turkey	Northern Finland	0.055344	0.008179	6.766
Turkey2	Domestic NW-Turkey	Northern Finland	0.131758	0.015851	8.312
Greece	Domestic NW-Turkey	Russia	0.31087	0.037527	8.284
Kazakhstan	Domestic NW-Turkey	Russia	0.311648	0.034987	8.907
Denmark	Domestic NW-Turkey	Russia	0.296395	0.031823	9.314
Smola, Norway	Domestic NW-Turkey	Russia	0.31513	0.033822	9.317
Fereydunkenar, Iran	Domestic NW-Turkey	Russia	0.299714	0.03207	9.346
Turkey1	Domestic NW-Turkey	Russia	0.359823	0.03715	9.686
Gilan, Iran	Domestic NW-Turkey	Russia	0.315828	0.032228	9.8
Vega, Norway	Domestic NW-Turkey	Russia	0.33809	0.034419	9.823
Turkey2	Domestic NW-Turkey	Russia	0.451313	0.045509	9.917
Northern Finland	Domestic NW-Turkey	Russia	0.321896	0.03245	9.92
Southern Finland	Domestic NW-Turkey	Russia	0.317366	0.031724	10.004
Netherlands	Domestic NW-Turkey	Russia	0.346413	0.034424	10.063
Denmark	Domestic NW-Turkey	Smola, Norway	0.031404	0.008258	3.803
Vega, Norway	Domestic NW-Turkey	Smola, Norway	0.02371	0.006225	3.809
Greece	Domestic NW-Turkey	Smola, Norway	0.045243	0.01091	4.147
Russia	Domestic NW-Turkey	Smola, Norway	0.044902	0.009681	4.638
Turkey1	Domestic NW-Turkey	Smola, Norway	0.059457	0.011466	5.186
Southern Finland	Domestic NW-Turkey	Smola, Norway	0.030357	0.005736	5.292
Northern Finland	Domestic NW-Turkey	Smola, Norway	0.02905	0.00513	5.663
Fereydunkenar, Iran	Domestic NW-Turkey	Smola, Norway	0.046007	0.008106	5.676
Kazakhstan	Domestic NW-Turkey	Smola, Norway	0.047838	0.008179	5.849
Gilan, Iran	Domestic NW-Turkey	Smola, Norway	0.04689	0.006835	6.86
Netherlands	Domestic NW-Turkey	Smola, Norway	0.055004	0.007472	7.361
Turkey2	Domestic NW-Turkey	Smola, Norway	0.127729	0.01501	8.509
Northern Finland	Domestic NW-Turkey	Southern Finland	0.011214	0.004633	2.421
Denmark	Domestic NW-Turkey	Southern Finland	0.017866	0.00616	2.9
Greece	Domestic NW-Turkey	Southern Finland	0.025002	0.006925	3.61
Smola, Norway	Domestic NW-Turkey	Southern Finland	0.019559	0.004537	4.311
Russia	Domestic NW-Turkey	Southern Finland	0.03408	0.007649	4.455
Turkey1	Domestic NW-Turkey	Southern Finland	0.045866	0.009754	4.702
Kazakhstan	Domestic NW-Turkey	Southern Finland	0.034219	0.006603	5.183
Fereydunkenar, Iran	Domestic NW-Turkey	Southern Finland	0.029851	0.005333	5.597
Vega, Norway	Domestic NW-Turkey	Southern Finland	0.027316	0.004581	5.963
Gilan, Iran	Domestic NW-Turkey	Southern Finland	0.032126	0.004617	6.958
Netherlands	Domestic NW-Turkey	Southern Finland	0.040541	0.005527	7.335
Turkey2	Domestic NW-Turkey	Southern Finland	0.105794	0.013848	7.64
Russia	Domestic NW-Turkey	Turkey1	0.970529	0.148061	6.555
Greece	Domestic NW-Turkey	Turkey1	1.01017	0.151017	6.689
Kazakhstan	Domestic NW-Turkey	Turkey1	0.995542	0.147995	6.727
Fereydunkenar, Iran	Domestic NW-Turkey	Turkey1	0.983597	0.146193	6.728
Southern Finland	Domestic NW-Turkey	Turkey1	0.982612	0.146022	6.729
Northern Finland	Domestic NW-Turkey	Turkey1	0.987777	0.14673	6.732
Gilan, Iran	Domestic NW-Turkey	Turkey1	0.99457	0.147157	6.759
Turkey2	Domestic NW-Turkey	Turkey1	0.931638	0.137278	6.786
Denmark	Domestic NW-Turkey	Turkey1	0.982203	0.144638	6.791
Smola, Norway	Domestic NW-Turkey	Turkey1	0.993056	0.145285	6.835
Vega, Norway	Domestic NW-Turkey	Turkey1	0.998044	0.145591	6.855
Netherlands	Domestic NW-Turkey	Turkey1	0.999271	0.145673	6.86
Russia	Domestic NW-Turkey	Turkey2	0.285551	0.074653	3.825
Denmark	Domestic NW-Turkey	Turkey2	0.285103	0.073405	3.884
Kazakhstan	Domestic NW-Turkey	Turkey2	0.277033	0.071079	3.898
Southern Finland	Domestic NW-Turkey	Turkey2	0.277866	0.071138	3.906
Greece	Domestic NW-Turkey	Turkey2	0.285418	0.072501	3.937
Smola, Norway	Domestic NW-Turkey	Turkey2	0.291085	0.073727	3.948
Northern Finland	Domestic NW-Turkey	Turkey2	0.286452	0.07231	3.961
Fereydunkenar, Iran	Domestic NW-Turkey	Turkey2	0.285357	0.071894	3.969
Vega, Norway	Domestic NW-Turkey	Turkey2	0.293276	0.073459	3.992
Netherlands	Domestic NW-Turkey	Turkey2	0.295097	0.073432	4.019
Gilan, Iran	Domestic NW-Turkey	Turkey2	0.282922	0.069951	4.045
Smola, Norway	Domestic NW-Turkey	Vega, Norway	0.029566	0.006795	4.351
Denmark	Domestic NW-Turkey	Vega, Norway	0.042343	0.007961	5.319
Northern Finland	Domestic NW-Turkey	Vega, Norway	0.039483	0.00732	5.394
Russia	Domestic NW-Turkey	Vega, Norway	0.056742	0.009497	5.975
Turkey1	Domestic NW-Turkey	Vega, Norway	0.071938	0.012001	5.994
Greece	Domestic NW-Turkey	Vega, Norway	0.05985	0.009901	6.045
Fereydunkenar, Iran	Domestic NW-Turkey	Vega, Norway	0.061985	0.008855	7
Kazakhstan	Domestic NW-Turkey	Vega, Norway	0.062097	0.008868	7.002
Southern Finland	Domestic NW-Turkey	Vega, Norway	0.044758	0.006354	7.044
Gilan, Iran	Domestic NW-Turkey	Vega, Norway	0.065103	0.008448	7.706
Turkey2	Domestic NW-Turkey	Vega, Norway	0.138534	0.016338	8.479
Netherlands	Domestic NW-Turkey	Vega, Norway	0.068166	0.007909	8.618
Russia	Landes	Denmark	0.047547	0.013052	3.643
Northern Finland	Landes	Denmark	0.049841	0.010381	4.801
Fereydunkenar, Iran	Landes	Denmark	0.058362	0.010428	5.597
Netherlands	Landes	Denmark	0.070589	0.012275	5.751
Smola, Norway	Landes	Denmark	0.055416	0.009499	5.834
Vega, Norway	Landes	Denmark	0.055956	0.009509	5.885
Turkey1	Landes	Denmark	0.080075	0.013457	5.95
Greece	Landes	Denmark	0.061298	0.010016	6.12
Southern Finland	Landes	Denmark	0.053027	0.008415	6.302
Gilan, Iran	Landes	Denmark	0.068151	0.009442	7.218
Kazakhstan	Landes	Denmark	0.075193	0.00985	7.634
Turkey2	Landes	Denmark	0.147861	0.01855	7.971
Russia	Landes	Fereydunkenar, Iran	0.048414	0.012569	3.852
Turkey1	Landes	Fereydunkenar, Iran	0.072593	0.013998	5.186
Northern Finland	Landes	Fereydunkenar, Iran	0.058817	0.00883	6.661
Greece	Landes	Fereydunkenar, Iran	0.070485	0.009626	7.323
Denmark	Landes	Fereydunkenar, Iran	0.054504	0.007399	7.367
Smola, Norway	Landes	Fereydunkenar, Iran	0.063498	0.008436	7.527
Kazakhstan	Landes	Fereydunkenar, Iran	0.066451	0.008569	7.755
Southern Finland	Landes	Fereydunkenar, Iran	0.059201	0.007545	7.846
Vega, Norway	Landes	Fereydunkenar, Iran	0.068645	0.008614	7.969
Gilan, Iran	Landes	Fereydunkenar, Iran	0.057776	0.006796	8.502
Turkey2	Landes	Fereydunkenar, Iran	0.138682	0.01559	8.896
Netherlands	Landes	Fereydunkenar, Iran	0.081999	0.009018	9.093
Russia	Landes	Gilan, Iran	0.036715	0.010178	3.607
Turkey1	Landes	Gilan, Iran	0.058889	0.012765	4.613
Northern Finland	Landes	Gilan, Iran	0.039051	0.007032	5.553
Greece	Landes	Gilan, Iran	0.053494	0.008574	6.239
Fereydunkenar, Iran	Landes	Gilan, Iran	0.035817	0.005631	6.36
Smola, Norway	Landes	Gilan, Iran	0.044226	0.006939	6.373
Denmark	Landes	Gilan, Iran	0.041397	0.006411	6.457
Vega, Norway	Landes	Gilan, Iran	0.051833	0.007533	6.881
Netherlands	Landes	Gilan, Iran	0.065653	0.008419	7.798
Kazakhstan	Landes	Gilan, Iran	0.05048	0.00626	8.063
Southern Finland	Landes	Gilan, Iran	0.042415	0.005199	8.159
Turkey2	Landes	Gilan, Iran	0.113879	0.013855	8.22
Northern Finland	Landes	Greece	0.048379	0.021714	2.228
Smola, Norway	Landes	Greece	0.048464	0.021007	2.307
Vega, Norway	Landes	Greece	0.051949	0.021543	2.411
Fereydunkenar, Iran	Landes	Greece	0.053114	0.020646	2.573
Gilan, Iran	Landes	Greece	0.058939	0.021092	2.794
Netherlands	Landes	Greece	0.063152	0.022584	2.796
Turkey1	Landes	Greece	0.088337	0.029266	3.018
Kazakhstan	Landes	Greece	0.06844	0.02142	3.195
Turkey2	Landes	Greece	0.126353	0.027915	4.526
Denmark	Landes	Kazakhstan	0.020428	0.008886	2.299
Northern Finland	Landes	Kazakhstan	0.019572	0.008112	2.413
Turkey1	Landes	Kazakhstan	0.03837	0.014947	2.567
Greece	Landes	Kazakhstan	0.033017	0.011203	2.947
Gilan, Iran	Landes	Kazakhstan	0.023359	0.007585	3.08
Smola, Norway	Landes	Kazakhstan	0.025374	0.008131	3.121
Vega, Norway	Landes	Kazakhstan	0.029017	0.008426	3.444
Southern Finland	Landes	Kazakhstan	0.024733	0.006894	3.588
Netherlands	Landes	Kazakhstan	0.045182	0.009783	4.618
Turkey2	Landes	Kazakhstan	0.092898	0.017011	5.461
Northern Finland	Landes	Netherlands	0.014235	0.006787	2.097
Russia	Landes	Netherlands	0.019245	0.008983	2.142
Greece	Landes	Netherlands	0.023722	0.009592	2.473
Smola, Norway	Landes	Netherlands	0.018064	0.006954	2.598
Turkey1	Landes	Netherlands	0.027397	0.009877	2.774
Southern Finland	Landes	Netherlands	0.016485	0.005936	2.777
Fereydunkenar, Iran	Landes	Netherlands	0.02543	0.008714	2.918
Vega, Norway	Landes	Netherlands	0.020069	0.006698	2.996
Gilan, Iran	Landes	Netherlands	0.031309	0.007742	4.044
Kazakhstan	Landes	Netherlands	0.038175	0.009031	4.227
Turkey2	Landes	Netherlands	0.083856	0.014815	5.66
Russia	Landes	Northern Finland	0.039893	0.01118	3.568
Denmark	Landes	Northern Finland	0.031246	0.00823	3.796
Vega, Norway	Landes	Northern Finland	0.032944	0.008642	3.812
Smola, Norway	Landes	Northern Finland	0.033145	0.008604	3.853
Southern Finland	Landes	Northern Finland	0.026605	0.006703	3.969
Fereydunkenar, Iran	Landes	Northern Finland	0.044369	0.010206	4.347
Greece	Landes	Northern Finland	0.050873	0.011234	4.529
Turkey1	Landes	Northern Finland	0.058982	0.012364	4.77
Kazakhstan	Landes	Northern Finland	0.055249	0.009643	5.729
Gilan, Iran	Landes	Northern Finland	0.046583	0.007906	5.892
Netherlands	Landes	Northern Finland	0.054773	0.009246	5.924
Turkey2	Landes	Northern Finland	0.126853	0.017392	7.294
Kazakhstan	Landes	Russia	0.334198	0.039291	8.506
Denmark	Landes	Russia	0.311209	0.036514	8.523
Greece	Landes	Russia	0.324174	0.037408	8.666
Fereydunkenar, Iran	Landes	Russia	0.311977	0.03516	8.873
Turkey1	Landes	Russia	0.366295	0.041256	8.878
Smola, Norway	Landes	Russia	0.327847	0.036348	9.02
Northern Finland	Landes	Russia	0.331987	0.036025	9.216
Vega, Norway	Landes	Russia	0.33763	0.036135	9.344
Gilan, Iran	Landes	Russia	0.330871	0.035291	9.376
Southern Finland	Landes	Russia	0.331959	0.03449	9.625
Turkey2	Landes	Russia	0.449413	0.045039	9.978
Netherlands	Landes	Russia	0.363656	0.036303	10.017
Vega, Norway	Landes	Smola, Norway	0.019679	0.007995	2.462
Russia	Landes	Smola, Norway	0.036725	0.011176	3.286
Denmark	Landes	Smola, Norway	0.033839	0.00902	3.752
Greece	Landes	Smola, Norway	0.047824	0.011245	4.253
Turkey1	Landes	Smola, Norway	0.057544	0.013104	4.391
Fereydunkenar, Iran	Landes	Smola, Norway	0.046238	0.009797	4.72
Northern Finland	Landes	Smola, Norway	0.030451	0.006159	4.944
Southern Finland	Landes	Smola, Norway	0.031691	0.006179	5.129
Kazakhstan	Landes	Smola, Norway	0.059012	0.009302	6.344
Netherlands	Landes	Smola, Norway	0.056808	0.008951	6.346
Gilan, Iran	Landes	Smola, Norway	0.049676	0.007493	6.63
Turkey2	Landes	Smola, Norway	0.122946	0.015588	7.887
Russia	Landes	Southern Finland	0.025049	0.009195	2.724
Denmark	Landes	Southern Finland	0.018654	0.006724	2.774
Smola, Norway	Landes	Southern Finland	0.018145	0.005245	3.46
Greece	Landes	Southern Finland	0.026244	0.007365	3.563
Turkey1	Landes	Southern Finland	0.040787	0.011132	3.664
Fereydunkenar, Iran	Landes	Southern Finland	0.028263	0.007537	3.75
Vega, Norway	Landes	Southern Finland	0.021543	0.005412	3.98
Kazakhstan	Landes	Southern Finland	0.043742	0.006914	6.327
Gilan, Iran	Landes	Southern Finland	0.033332	0.005267	6.328
Netherlands	Landes	Southern Finland	0.040315	0.006321	6.378
Turkey2	Landes	Southern Finland	0.099635	0.014402	6.918
Russia	Landes	Turkey1	0.959157	0.146064	6.567
Turkey2	Landes	Turkey1	0.921191	0.138756	6.639
Greece	Landes	Turkey1	1.0089	0.151721	6.65
Southern Finland	Landes	Turkey1	0.980374	0.146555	6.689
Fereydunkenar, Iran	Landes	Turkey1	0.979026	0.146046	6.704
Northern Finland	Landes	Turkey1	0.986078	0.146784	6.718
Kazakhstan	Landes	Turkey1	1.00399	0.148486	6.762
Gilan, Iran	Landes	Turkey1	0.993664	0.146813	6.768
Smola, Norway	Landes	Turkey1	0.989519	0.14606	6.775
Denmark	Landes	Turkey1	0.983741	0.144929	6.788
Vega, Norway	Landes	Turkey1	0.987101	0.144851	6.815
Netherlands	Landes	Turkey1	1.00081	0.144969	6.904
Russia	Landes	Turkey2	0.285247	0.072511	3.934
Vega, Norway	Landes	Turkey2	0.290635	0.073648	3.946
Denmark	Landes	Turkey2	0.294735	0.074383	3.962
Southern Finland	Landes	Turkey2	0.285213	0.071036	4.015
Northern Finland	Landes	Turkey2	0.292538	0.072739	4.022
Fereydunkenar, Iran	Landes	Turkey2	0.290351	0.072092	4.027
Smola, Norway	Landes	Turkey2	0.296816	0.073389	4.044
Gilan, Iran	Landes	Turkey2	0.291248	0.071141	4.094
Netherlands	Landes	Turkey2	0.304597	0.074174	4.107
Kazakhstan	Landes	Turkey2	0.296557	0.071998	4.119
Greece	Landes	Turkey2	0.295187	0.070939	4.161
Smola, Norway	Landes	Vega, Norway	0.03489	0.009083	3.841
Russia	Landes	Vega, Norway	0.056363	0.012273	4.593
Denmark	Landes	Vega, Norway	0.050152	0.010327	4.857
Turkey1	Landes	Vega, Norway	0.074946	0.014312	5.237
Northern Finland	Landes	Vega, Norway	0.045897	0.008697	5.278
Greece	Landes	Vega, Norway	0.067541	0.011306	5.974
Fereydunkenar, Iran	Landes	Vega, Norway	0.067463	0.010995	6.136
Southern Finland	Landes	Vega, Norway	0.051009	0.007439	6.857
Kazakhstan	Landes	Vega, Norway	0.078552	0.010434	7.529
Gilan, Iran	Landes	Vega, Norway	0.073037	0.009666	7.556
Turkey2	Landes	Vega, Norway	0.138613	0.01737	7.98
Netherlands	Landes	Vega, Norway	0.074885	0.008613	8.694
Russia	West of England	Denmark	0.062714	0.011037	5.682
Northern Finland	West of England	Denmark	0.048769	0.00837	5.827
Greece	West of England	Denmark	0.065404	0.010972	5.961
Smola, Norway	West of England	Denmark	0.054463	0.008454	6.442
Vega, Norway	West of England	Denmark	0.051355	0.007784	6.598
Netherlands	West of England	Denmark	0.068891	0.010092	6.826
Fereydunkenar, Iran	West of England	Denmark	0.057848	0.0082	7.055
Kazakhstan	West of England	Denmark	0.060911	0.008526	7.145
Turkey2	West of England	Denmark	0.122012	0.016947	7.2
Southern Finland	West of England	Denmark	0.052279	0.006995	7.473
Turkey1	West of England	Denmark	0.096127	0.012334	7.794
Gilan, Iran	West of England	Denmark	0.067473	0.007948	8.49
Russia	West of England	Fereydunkenar, Iran	0.06113	0.010526	5.807
Turkey1	West of England	Fereydunkenar, Iran	0.091522	0.013587	6.736
Greece	West of England	Fereydunkenar, Iran	0.074938	0.010361	7.232
Kazakhstan	West of England	Fereydunkenar, Iran	0.053081	0.007142	7.432
Turkey2	West of England	Fereydunkenar, Iran	0.115092	0.014235	8.085
Smola, Norway	West of England	Fereydunkenar, Iran	0.062531	0.006893	9.071
Northern Finland	West of England	Fereydunkenar, Iran	0.058463	0.00639	9.149
Denmark	West of England	Fereydunkenar, Iran	0.055496	0.005984	9.275
Gilan, Iran	West of England	Fereydunkenar, Iran	0.057406	0.006071	9.456
Vega, Norway	West of England	Fereydunkenar, Iran	0.064525	0.00637	10.13
Southern Finland	West of England	Fereydunkenar, Iran	0.058532	0.005146	11.374
Netherlands	West of England	Fereydunkenar, Iran	0.080931	0.006822	11.863
Russia	West of England	Gilan, Iran	0.050826	0.010496	4.842
Kazakhstan	West of England	Gilan, Iran	0.037182	0.006569	5.661
Greece	West of England	Gilan, Iran	0.05845	0.009043	6.463
Denmark	West of England	Gilan, Iran	0.04258	0.006573	6.478
Turkey1	West of England	Gilan, Iran	0.077547	0.011767	6.59
Smola, Norway	West of England	Gilan, Iran	0.043878	0.006224	7.05
Fereydunkenar, Iran	West of England	Gilan, Iran	0.03545	0.004974	7.127
Northern Finland	West of England	Gilan, Iran	0.03902	0.005382	7.249
Turkey2	West of England	Gilan, Iran	0.090815	0.011845	7.667
Vega, Norway	West of England	Gilan, Iran	0.048202	0.0061	7.902
Netherlands	West of England	Gilan, Iran	0.064828	0.007759	8.355
Southern Finland	West of England	Gilan, Iran	0.041931	0.004432	9.462
Northern Finland	West of England	Greece	0.041748	0.019537	2.137
Vega, Norway	West of England	Greece	0.041351	0.018947	2.182
Smola, Norway	West of England	Greece	0.041173	0.018444	2.232
Fereydunkenar, Iran	West of England	Greece	0.046243	0.019374	2.387
Russia	West of England	Greece	0.05877	0.02412	2.437
Kazakhstan	West of England	Greece	0.048717	0.019238	2.532
Netherlands	West of England	Greece	0.056021	0.020899	2.681
Gilan, Iran	West of England	Greece	0.052246	0.019356	2.699
Turkey1	West of England	Greece	0.099447	0.026109	3.809
Turkey2	West of England	Greece	0.096881	0.024179	4.007
Russia	West of England	Kazakhstan	0.02929	0.010139	2.889
Fereydunkenar, Iran	West of England	Kazakhstan	0.028802	0.00813	3.543
Denmark	West of England	Kazakhstan	0.033798	0.008913	3.792
Northern Finland	West of England	Kazakhstan	0.032494	0.00819	3.968
Smola, Norway	West of England	Kazakhstan	0.038071	0.009545	3.989
Gilan, Iran	West of England	Kazakhstan	0.036321	0.008225	4.416
Vega, Norway	West of England	Kazakhstan	0.038389	0.008642	4.442
Turkey1	West of England	Kazakhstan	0.070424	0.014834	4.748
Greece	West of England	Kazakhstan	0.051054	0.010672	4.784
Southern Finland	West of England	Kazakhstan	0.036835	0.007446	4.947
Turkey2	West of England	Kazakhstan	0.082857	0.015661	5.291
Netherlands	West of England	Kazakhstan	0.056939	0.008155	6.983
Northern Finland	West of England	Netherlands	0.01476	0.005253	2.81
Vega, Norway	West of England	Netherlands	0.017235	0.005676	3.036
Southern Finland	West of England	Netherlands	0.016901	0.005015	3.37
Smola, Norway	West of England	Netherlands	0.018325	0.005357	3.42
Kazakhstan	West of England	Netherlands	0.026529	0.00681	3.895
Greece	West of England	Netherlands	0.029014	0.007315	3.967
Fereydunkenar, Iran	West of England	Netherlands	0.025679	0.006256	4.105
Turkey1	West of England	Netherlands	0.045275	0.010918	4.147
Russia	West of England	Netherlands	0.03316	0.00775	4.278
Turkey2	West of England	Netherlands	0.063292	0.01298	4.876
Gilan, Iran	West of England	Netherlands	0.031719	0.005932	5.347
Vega, Norway	West of England	Northern Finland	0.029992	0.006517	4.602
Denmark	West of England	Northern Finland	0.032379	0.006693	4.837
Smola, Norway	West of England	Northern Finland	0.033267	0.006557	5.073
Russia	West of England	Northern Finland	0.055264	0.01088	5.079
Southern Finland	West of England	Northern Finland	0.027042	0.005305	5.098
Kazakhstan	West of England	Northern Finland	0.042937	0.008284	5.183
Greece	West of England	Northern Finland	0.056159	0.010153	5.531
Fereydunkenar, Iran	West of England	Northern Finland	0.044373	0.007504	5.913
Turkey1	West of England	Northern Finland	0.076103	0.012262	6.206
Turkey2	West of England	Northern Finland	0.102292	0.015017	6.812
Gilan, Iran	West of England	Northern Finland	0.046905	0.0066	7.107
Netherlands	West of England	Northern Finland	0.054632	0.007548	7.238
Greece	West of England	Russia	0.304317	0.039258	7.752
Kazakhstan	West of England	Russia	0.297465	0.035868	8.293
Denmark	West of England	Russia	0.290241	0.033091	8.771
Smola, Norway	West of England	Russia	0.308769	0.034674	8.905
Vega, Norway	West of England	Russia	0.312119	0.034659	9.005
Turkey1	West of England	Russia	0.372964	0.040876	9.124
Gilan, Iran	West of England	Russia	0.309834	0.033706	9.192
Northern Finland	West of England	Russia	0.311368	0.033728	9.232
Turkey2	West of England	Russia	0.400676	0.043147	9.286
Fereydunkenar, Iran	West of England	Russia	0.291789	0.031393	9.295
Southern Finland	West of England	Russia	0.310126	0.032911	9.423
Netherlands	West of England	Russia	0.340276	0.03551	9.582
Vega, Norway	West of England	Smola, Norway	0.016348	0.006166	2.651
Denmark	West of England	Smola, Norway	0.035301	0.007477	4.721
Greece	West of England	Smola, Norway	0.052625	0.010176	5.171
Kazakhstan	West of England	Smola, Norway	0.046471	0.008569	5.423
Southern Finland	West of England	Smola, Norway	0.031768	0.005793	5.484
Russia	West of England	Smola, Norway	0.048635	0.00878	5.539
Fereydunkenar, Iran	West of England	Smola, Norway	0.046043	0.008298	5.549
Turkey1	West of England	Smola, Norway	0.074534	0.012117	6.151
Northern Finland	West of England	Smola, Norway	0.030761	0.004995	6.158
Turkey2	West of England	Smola, Norway	0.100155	0.013576	7.377
Netherlands	West of England	Smola, Norway	0.05616	0.007436	7.552
Gilan, Iran	West of England	Smola, Norway	0.04969	0.006512	7.63
Northern Finland	West of England	Southern Finland	0.011562	0.004128	2.801
Denmark	West of England	Southern Finland	0.020172	0.005905	3.416
Vega, Norway	West of England	Southern Finland	0.01894	0.004642	4.081
Greece	West of England	Southern Finland	0.030723	0.007186	4.275
Smola, Norway	West of England	Southern Finland	0.018378	0.004053	4.534
Russia	West of England	Southern Finland	0.038024	0.008149	4.666
Fereydunkenar, Iran	West of England	Southern Finland	0.028497	0.005806	4.908
Kazakhstan	West of England	Southern Finland	0.031323	0.006079	5.153
Turkey1	West of England	Southern Finland	0.059362	0.01035	5.735
Turkey2	West of England	Southern Finland	0.07797	0.012998	5.999
Netherlands	West of England	Southern Finland	0.040393	0.005433	7.434
Gilan, Iran	West of England	Southern Finland	0.03374	0.00422	7.996
Turkey2	West of England	Turkey1	0.877145	0.133265	6.582
Russia	West of England	Turkey1	0.960896	0.145557	6.601
Kazakhstan	West of England	Turkey1	0.971151	0.144784	6.708
Northern Finland	West of England	Turkey1	0.966893	0.143903	6.719
Greece	West of England	Turkey1	0.997525	0.148287	6.727
Southern Finland	West of England	Turkey1	0.963397	0.143159	6.73
Fereydunkenar, Iran	West of England	Turkey1	0.96186	0.142708	6.74
Vega, Norway	West of England	Turkey1	0.967129	0.142764	6.774
Gilan, Iran	West of England	Turkey1	0.977125	0.144213	6.776
Smola, Norway	West of England	Turkey1	0.97246	0.142338	6.832
Denmark	West of England	Turkey1	0.966899	0.141204	6.848
Netherlands	West of England	Turkey1	0.979648	0.142763	6.862
Turkey1	West of England	Turkey2	0.187435	0.087586	2.14
Vega, Norway	West of England	Turkey2	0.319103	0.078247	4.078
Denmark	West of England	Turkey2	0.326339	0.079759	4.092
Smola, Norway	West of England	Turkey2	0.327525	0.079974	4.095
Southern Finland	West of England	Turkey2	0.315711	0.07707	4.096
Kazakhstan	West of England	Turkey2	0.310884	0.075796	4.102
Russia	West of England	Turkey2	0.326792	0.078813	4.146
Northern Finland	West of England	Turkey2	0.323608	0.077751	4.162
Fereydunkenar, Iran	West of England	Turkey2	0.320995	0.076644	4.188
Netherlands	West of England	Turkey2	0.332753	0.079431	4.189
Gilan, Iran	West of England	Turkey2	0.322596	0.075827	4.254
Greece	West of England	Turkey2	0.331476	0.077751	4.263
Smola, Norway	West of England	Vega, Norway	0.037501	0.007189	5.217
Denmark	West of England	Vega, Norway	0.054046	0.008956	6.035
Russia	West of England	Vega, Norway	0.072421	0.01166	6.211
Greece	West of England	Vega, Norway	0.075272	0.011247	6.692
Northern Finland	West of England	Vega, Norway	0.049123	0.006802	7.222
Turkey1	West of England	Vega, Norway	0.09542	0.013049	7.313
Turkey2	West of England	Vega, Norway	0.117311	0.015424	7.606
Fereydunkenar, Iran	West of England	Vega, Norway	0.069973	0.00915	7.648
Kazakhstan	West of England	Vega, Norway	0.068535	0.008733	7.848
Southern Finland	West of England	Vega, Norway	0.05396	0.006475	8.333
Gilan, Iran	West of England	Vega, Norway	0.075915	0.008489	8.943
Netherlands	West of England	Vega, Norway	0.077244	0.008112	9.522
